# Supplementary material for: Prediction of Daily Streamflow Using Various Kernel Function Based Regression: A Case Study in India
Source: Research Square preprint supplement (doi:10.21203/rs.3.rs-784271/v1), 2021-08-13
Supplement: Supplementary file 1 [file 1a231bb9788db3c35f6ca966.docx]

**Highlights**

- Four Gaussian Processes Regression (GPR) models were used to model the daily discharge
- Models' precision was optimized by considering five different scenarios based on various input combinations of time-lags of stage and discharge values up to 5-day
- GPR-PUK kernel Model was more accurate and stable than the other developed models
- Performance of GPR models was evaluated by r, RMSE, RAE, RRSE and visual inspection like line diagram and scatter plot
