# Supplementary figures and images for: Prediction of Daily Streamflow Using Various Kernel Function Based Regression: A Case Study in India
Source: Research Square preprint supplement (doi:10.21203/rs.3.rs-784271/v1), 2021-08-13

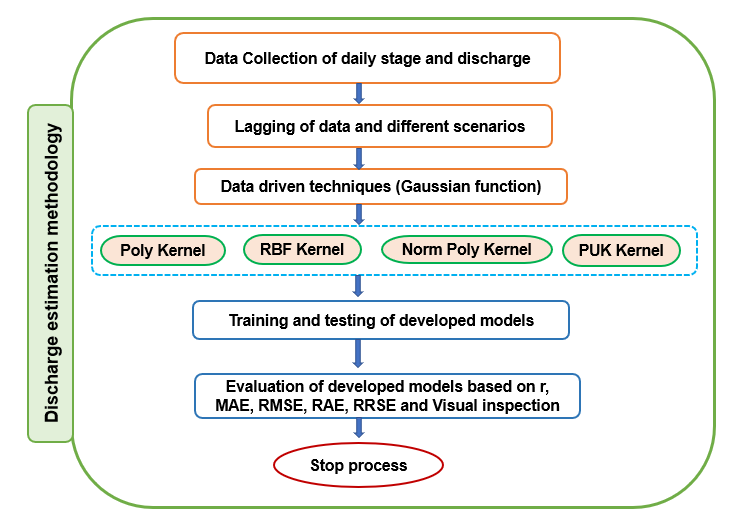

Supplement: Supplementary file 2 [file 854c9d5ad4653626b70eab48.docx]
